# Supplementary material for: Is Gender an Antecedent to Workplace Stressors? A Systematic Review and an Empirical Study Using a Person-Centred Approach
Source: MDPI journal article supplement (doi:10.3390/ijerph20085541), 2023-04-17
Supplement: s1 [file s1]

**Table S1. Fit Indices of the Alternative Factor Models for the MS-IT Tool for Each Gender Group.**

|                          | MLR $\chi^2$ | df  | RMSEA (90% C.I.) | CFI  | SRMR | AIC         | ECVI   |
|--------------------------|--------------|-----|------------------|------|------|-------------|--------|
| <b>Males (n=5,716)</b>   |              |     |                  |      |      |             |        |
| CFA Model                | 6621,767     | 539 | .044 (.044-.045) | .875 | .060 | 48,358.807  | 26.277 |
| ESEM Model               | 2574,514     | 371 | .032 (.030-.034) | .955 | .016 | 465,342.456 | 3.470  |
| BIFACTOR Model           | 5212,143     | 525 | .040 (.039-.041) | .900 | .046 | 478,170.264 | 18.615 |
| <b>Females (n=5,573)</b> |              |     |                  |      |      |             |        |
| CFA Model                | 7034,538     | 539 | .047 (.046-.047) | .867 | .061 | 467,661.368 | 27.915 |
| ESEM Model               | 2977,207     | 371 | .036 (.034-.037) | .946 | .019 | 459,927.257 | 4.012  |
| BIFACTOR Model           | 6246,469     | 525 | .044 (.034-.037) | .882 | .053 | 466,222.251 | 22.309 |

*Note.* MLR = Robust Maximum Likelihood; df = degrees of freedom; RMSEA = Root Mean Square Error of Approximation; CFI = Comparative fit Index; SRMR = Standardized Root Mean Square Residual; AIC = Akaike Information Criterion; ECVI = Expected Cross-Validation Index.

**Table S2. Gender Measurement Invariance Models of the Final Oblique ESEM 6-Factor Model.**

|            | MLR $\chi^2$ | df   | RMSEA (90% C.I.)   | CFI  | SRMR | Model Comparison      | $\Delta$ CFI |
|------------|--------------|------|--------------------|------|------|-----------------------|--------------|
| CONFIGURAL | 7,029        | 800  | .037 (.036 - .038) | .935 | .021 | -                     |              |
| METRIC     | 7,172.407    | 974  | .034 (.033 - .034) | .936 | .025 | Metric vs. Configural | -.001        |
| SCALAR     | 7,486.984    | 1003 | .034 (.033 - .034) | .934 | .027 | Scalar vs. Metric     | .002         |
| STRICT     | 7,383.691    | 1038 | .033 (.033 - .034) | .935 | .030 | Strict vs. Scalar     | -.001        |

*Note.* MLR = Robust Maximum Likelihood; df = degrees of freedom; RMSEA = Root Mean Square Error of Approximation; CFI = Comparative fit Index; SRMR = Standardized Root Mean Square Residual.

**Table S3. Factor Loadings on the Strict Invariance 6-Factor ESEM Model.**

|         | ESEM Factor 1 |        | ESEM Factor 2 |        | ESEM Factor 3 |        | ESEM Factor 4      |        | ESEM Factor 5 |        | ESEM Factor 6      |        |
|---------|---------------|--------|---------------|--------|---------------|--------|--------------------|--------|---------------|--------|--------------------|--------|
|         | Role Clarity  |        | Control       |        | Demands       |        | Poor Relationships |        | Peer Support  |        | Management Support |        |
|         | Male          | Female | Male          | Female | Male          | Female | Male               | Female | Male          | Female | Male               | Female |
|         | s             | s      | s             | s      | s             | s      | s                  | s      | s             | s      | s                  | s      |
| Item 1  | .62           | .61    | .04           | .04    | .03           | .03    | -.09               | -.09   | .03           | .03    | .07                | .07    |
| Item 4  | .55           | .54    | .15           | .15    | -.07          | -.08   | .00                | .00    | .01           | .01    | -.14               | -.15   |
| Item 11 | .73           | .73    | .04           | .04    | -.02          | -.02   | -.04               | -.04   | .04           | .04    | -.03               | -.03   |
| Item 13 | .70           | .69    | -.03          | -.03   | .00           | .00    | -.04               | -.05   | .01           | .01    | .18                | .18    |
| Item 17 | .67           | .67    | .02           | .02    | -.02          | -.02   | -.01               | -.01   | .00           | .00    | .15                | .15    |
| Item 2  | -.21          | -.20   | .57           | .54    | -.14          | -.15   | -.03               | -.03   | .02           | .02    | -.04               | -.04   |
| Item 10 | .11           | .10    | .62           | .60    | -.06          | -.07   | .03                | .03    | .04           | .04    | .02                | .02    |

|         |      |      |            |            |            |            |            |            |            |            |            |            |
|---------|------|------|------------|------------|------------|------------|------------|------------|------------|------------|------------|------------|
| Item 15 | .09  | .09  | <b>.78</b> | <b>.76</b> | .04        | .04        | -.04       | -.04       | -.05       | -.06       | .00        | .00        |
| Item 19 | .00  | .00  | <b>.74</b> | <b>.72</b> | .00        | .00        | .04        | .04        | -.03       | -.03       | .01        | .01        |
| Item 25 | .13  | .13  | <b>.55</b> | <b>.53</b> | .08        | .09        | -.05       | -.05       | .09        | .09        | .16        | .17        |
| Item 30 | -.11 | -.11 | <b>.37</b> | <b>.35</b> | .00        | .00        | -.02       | -.02       | .06        | .06        | .14        | .14        |
| Item 3  | -.10 | -.10 | -.06       | -.06       | <b>.52</b> | <b>.54</b> | .02        | .02        | -.03       | -.03       | -.02       | -.02       |
| Item 6  | -.12 | -.12 | -.02       | -.01       | <b>.68</b> | <b>.70</b> | .04        | .04        | -.01       | -.01       | .02        | .02        |
| Item 9  | .26  | .24  | .05        | .05        | <b>.69</b> | <b>.70</b> | -.02       | -.02       | .02        | .02        | -.02       | -.02       |
| Item 12 | -.07 | -.06 | .06        | .06        | <b>.70</b> | <b>.72</b> | -.01       | -.01       | .00        | .00        | -.01       | -.01       |
| Item 16 | .21  | .20  | -.24       | -.23       | <b>.40</b> | <b>.41</b> | .06        | .06        | -.04       | -.04       | .00        | .00        |
| Item 18 | .06  | .06  | -.19       | -.18       | <b>.34</b> | <b>.36</b> | .17        | .18        | .02        | .02        | -.03       | -.03       |
| Item 20 | .20  | .18  | .01        | .01        | <b>.66</b> | <b>.68</b> | -.01       | -.01       | -.01       | -.01       | -.06       | -.06       |
| Item 22 | -.05 | -.05 | -.05       | -.05       | <b>.69</b> | <b>.72</b> | .07        | .07        | .00        | .00        | -.01       | -.01       |
| Item 5  | -.02 | -.02 | -.03       | -.02       | .04        | .04        | <b>.76</b> | <b>.78</b> | -.01       | -.01       | .00        | .00        |
| Item 14 | -.06 | -.06 | .08        | .08        | .07        | .07        | <b>.41</b> | <b>.43</b> | -.31       | -.31       | -.03       | -.03       |
| Item 21 | -.02 | -.02 | -.03       | -.03       | .04        | .04        | <b>.76</b> | <b>.78</b> | -.01       | -.01       | -.05       | -.05       |
| Item 34 | .00  | .00  | -.01       | -.01       | .02        | .02        | <b>.32</b> | <b>.33</b> | -.17       | -.17       | .00        | .00        |
| Item 7  | .00  | .00  | -.01       | -.01       | -.07       | -.07       | .02        | .02        | <b>.74</b> | <b>.75</b> | -.01       | -.01       |
| Item 24 | .01  | .01  | -.02       | -.01       | .03        | .04        | -.05       | -.05       | <b>.83</b> | <b>.83</b> | .01        | .01        |
| Item 27 | .02  | .02  | .05        | .05        | .10        | .10        | -.34       | -.35       | <b>.50</b> | <b>.50</b> | .01        | .01        |
| Item 31 | -.06 | -.06 | .06        | .06        | .07        | .07        | -.08       | -.08       | <b>.71</b> | <b>.71</b> | .06        | .06        |
| Item 8  | .08  | .08  | .01        | .01        | -.08       | -.09       | .04        | .05        | .37        | .38        | <b>.29</b> | <b>.29</b> |
| Item 23 | .00  | .00  | -.02       | -.02       | -.02       | -.02       | -.07       | -.07       | .02        | .02        | <b>.73</b> | <b>.73</b> |
| Item 29 | -.03 | -.03 | .02        | .02        | .04        | .04        | -.10       | -.11       | -.01       | -.01       | <b>.79</b> | <b>.79</b> |
| Item 33 | .03  | .03  | .03        | .03        | -.07       | -.07       | .02        | .02        | .35        | .37        | <b>.38</b> | <b>.39</b> |
| Item 35 | -.02 | -.02 | -.05       | -.04       | .06        | .07        | -.03       | -.03       | -.03       | -.03       | <b>.88</b> | <b>.88</b> |
| Item 26 | .08  | .08  | .12        | .12        | -.03       | -.04       | .02        | .02        | .02        | .03        | <b>.62</b> | <b>.63</b> |
| Item 28 | .11  | .10  | .04        | .04        | -.06       | -.06       | .02        | .02        | .06        | .07        | <b>.57</b> | <b>.58</b> |
| Item 32 | .36  | .35  | .04        | .04        | -.04       | -.04       | .06        | .06        | .11        | .11        | <b>.34</b> | <b>.36</b> |

Note. Factor loadings on the target factor are reported in bold.

**Table S4. Principal Effects of the Two-Way Factorial MANOVA.**

| Factor                           | Variable           | gdl <sub>1</sub><br>(gdl <sub>2</sub> =11,283) | F          | p      | partial<br>$\eta^2$ |
|----------------------------------|--------------------|------------------------------------------------|------------|--------|---------------------|
| <b>Profile Membership</b>        |                    |                                                |            |        |                     |
|                                  | Role Clarity       | 2                                              | 2,778.470  | < .001 | .330                |
|                                  | Control            | 2                                              | 3,424.436  | < .001 | .378                |
|                                  | Demands            | 2                                              | 1,304.807  | < .001 | .188                |
|                                  | Poor Relationships | 2                                              | 5,088.531  | < .001 | .474                |
|                                  | Peer Support       | 2                                              | 6,852.763  | < .001 | .548                |
|                                  | Management Support | 2                                              | 10,688.022 | < .001 | .655                |
| <b>Gender</b>                    |                    |                                                |            |        |                     |
|                                  | Role Clarity       | 1                                              | 9.906      | < .01  | .001                |
|                                  | Control            | 1                                              | 51.896     | < .001 | .005                |
|                                  | Demands            | 1                                              | 13.591     | < .001 | .001                |
|                                  | Poor Relationships | 1                                              | 15.561     | < .001 | .001                |
|                                  | Peer Support       | 1                                              | 1.228      | .268   | 0                   |
|                                  | Management Support | 1                                              | 13.021     | < .001 | .001                |
| <b>Profile Membership*Gender</b> |                    |                                                |            |        |                     |
|                                  | Role Clarity       | 2                                              | 48.137     | < .001 | .008                |
|                                  | Control            | 2                                              | 6.824      | .001   | .001                |
|                                  | Demands            | 2                                              | 22.671     | < .001 | .004                |
|                                  | Poor Relationships | 2                                              | 9.678      | < .001 | .002                |
|                                  | Peer Support       | 2                                              | .646       | .524   | 0                   |
|                                  | Management Support | 2                                              | 5.608      | < .01  | .001                |
